# Supplementary material
Source: HighWire-hosted journal article supplement (https://emboj.embopress.org/content/37/1/89/F5)

Figure 3B

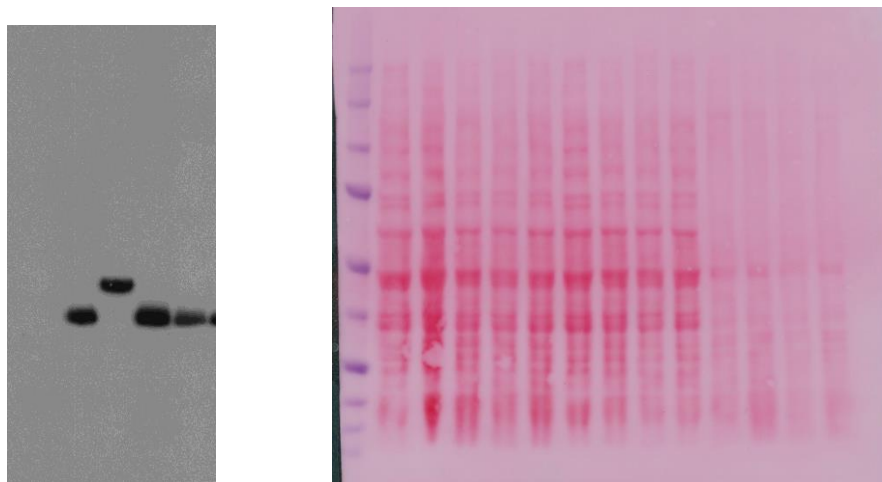

Figure 3D

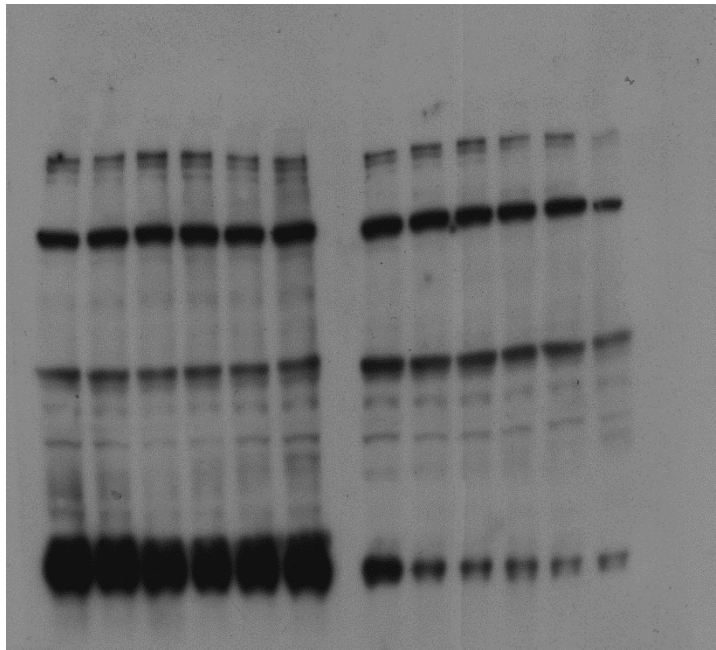

Middle panel

Upper panel

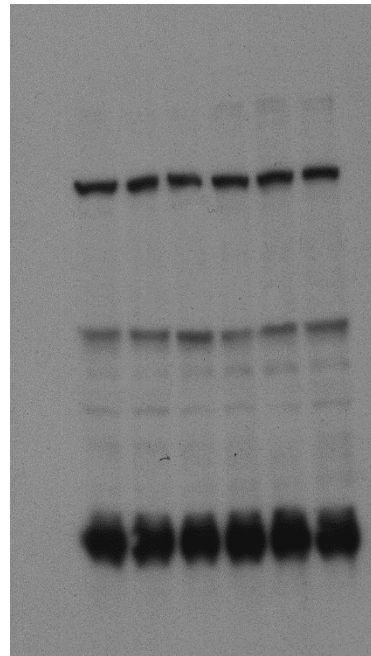

Lower panel

Figure 3E

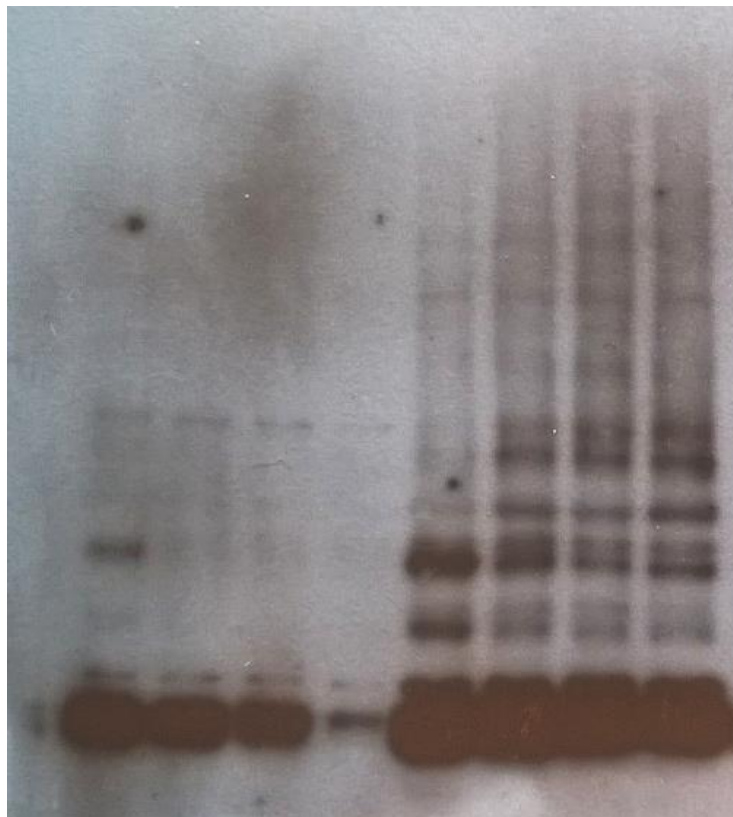

Fig 3F

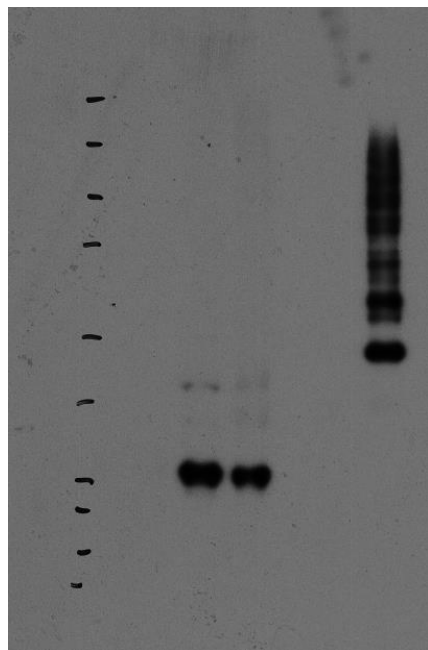

Supplement: inline-supplementary-material-3 [file inline-supplementary-material-3.pdf]
